# Supplementary material for: The Contribution of Obesity and Hyperandrogenemia to the Risk of Metabolic Disturbances of Women with Polycystic Ovary Syndrome Defines the Therapeutic Approach. Clinical Implications
Source: Preprints.org preprint supplement (doi:10.20944/preprints202307.0272.v1), 2023-07-05
Supplement: Supplementary file 1 [file Supplementary Table S1.docx]

Table S1. Univariate correlations among studied variables in a sample of 140 women with or without PCOS*

|  | BMI | FT | *M* | ADMA | ALT | Non-HDL | CIMT | ALT/AST |
| --- | --- | --- | --- | --- | --- | --- | --- | --- |
| BMI | -- |  |  |  |  |  |  |  |
| FT | 0.279a | -- |  |  |  |  |  |  |
| *M* | -0.567a | -0.296a | -- |  |  |  |  |  |
| ADMA | 0.273a | -0.030 | -0.300a | -- |  |  |  |  |
| ALT | 0.278a | 0.331a | -0.386a | 0.245b | -- |  |  |  |
| Non-HDL | 0.199c | 0.188c | -0.289a | 0.200c | 0.320a | -- |  |  |
| CIMT | 0.163d | -0.015 | -0.250b | 0.262b | 0.047 | 0.107 | -- |  |
| ALT/AST | -0.417a | -0.317a | 0.407a | -0.238b | -0.541a | -0.288a | -0.044 | -- |
| FV% | -0.097 | 0.056 | 0.200c | -0.152d | -0.130 | -0.059 | -0.007 | 0.107 |
| Sat fat | -0.129 | -0.050 | 0.114 | 0.040 | 0.007 | -0.004 | 0.021 | 0.021 |
| O3 FA | -0.296a | -0.107 | 0.331a | -0.035 | -0.117 | -0.054 | -0.075 | 0.192c |

*Pearson correlation analysis. a*p* <0.001, b*p* <0.01, c*p* <0.05, d*p* <0.10

PCOS, polycystic ovary syndrome; BMI, body mass index; FT, free testosterone; *M*, clam-derived glucose disposal; ADMA asymmetric dimethyl arginine; ALT, alanine aminotransferase; AST, aspartate aminotransferase; HDL, high density lipoproteins; CIMT, carotid intima media thickness; O3FA, omega-3 fatty acids
