# Supplementary material for: The Contribution of Obesity and Hyperandrogenemia to the Risk of Metabolic Disturbances of Women with Polycystic Ovary Syndrome Defines the Therapeutic Approach. Clinical Implications
Source: Preprints.org preprint supplement (doi:10.20944/preprints202307.0272.v1), 2023-07-05
Supplement: Supplementary file 2 [file Supplementary Table S2.docx]

Table S2 Clinical and biochemical characteristics of women with or without polycystic ovary syndrome (PCOS).

|  | PCOS,  n = 99 | Non-PCOS,  n = 41 |  | *P** |
| --- | --- | --- | --- | --- |
|  | Media ± SEM | | Difference (CI95%) |  |
| Age, years | 29.2 ± 0.55 | 29.2 ± 0.84 | -0.01 (-2.01, 1.99) | 0.993 |
| SBP, mmHg | 110 ± 1.1 | 106 ± 1.8 | 3.88 (-0.39, 8.15) | 0.074 |
| DBP, mmHg | 73 ± 0.98 | 71 ± 1.3 | 2.6 (-0.61, 5.86) | 0.111 |
| BMI, kg/m2 | 31.8 ± 0.59 | 27.2 ± 1.0 | 4.57 (2.3, 6.9) | <0.001 |
| Body fat, % | 42.4 ± 0.66 | 38.1 ± 1.3 | 4.27 (1.35, 7.2) | <0.001 |
| Glucose, mg/dL | 88 ± 1.1 | 84.8 ± 1.4 | 3.17 (-0.27, 6.61) | 0.071 |
| Insulin, µU/mL | 16.4 ± 1.3 | 7.5 ± 0.88 | 8.9 (5.8, 12.0) | <0.001 |
| TC, mg/dL | 167 ± 3.4 | 156 ± 5.1 | 11.1 (-1.1, 23) | 0.074 |
| TG, mg/dL | 153 ± 8.8 | 124 ± 11 | 29 (1.0, 56) | 0.043 |
| VLDL, mg/dL | 30.5 ± 1.8 | 24.3 ± 2.1 | 6.16 (0.7, 11.7) | 0.028 |
| HDL, mg/dL | 38 ± 0.94 | 42.4 ± 1.6 | -4.5 (-8.16, -0.84) | 0.017 |
| LDL, mg/dL | 99 ± 3.0 | 89 ± 4.2 | 10.25 0.08, 20.4) | 0.048 |
| Non-HDL, mg/dL | 130 ± 3.5 | 113 ± 5 | 16.7 (4.52, 28.9) | 0.008 |
| SHBG, mmol/mL | 28.2 ± 1.6 | 42.2 ± 3.4 | -14.1 (-21.6, -6.6) | <0.001 |
| *M*, mg/kg/min | 4.82 ± 0.27 | 7.8 ± 0.56 | -2.95 (-4.2, -1.7) | <0.001 |
| ALT, U/L | 40.5 ± 3.3 | 24.8 ±2.3 | 15.64 (7.8, 23.5) | <0.001 |
| AST, U/L | 37.3 ± 2.1 | 29.8 ± 1.5 | 7.48 (2.45, 12.5) | <0.001 |
| GGT, U/L | 30.1 ± 2.1 | 22.5 ± 3.1 | 7.56 (0.11, 15.0) | 0.047 |
| AST/ALT | 1.06 ± 0.04 | 1.35 ± 0.07 | -0.28 (-0.43, -0.13) | <0.001 |
| TT, ng/dL | 38.1 ± 2.4 | 26.8 ± 2.6 | 11.2 (4.2, 18.3) | 0.002 |
| FT, pg/mL | 8.2 ± 0.63 | 4.6 ± 0.60 | 3.2 (1.6, 4.9) | <0.001 |
| ADMA, μmol/L | 1.13 ± 0.04 | 1.01 ± 0.04 | 0.11 (0.02, 0.21) | 0.024 |
| CIMT, mm | 0.61 ± 0.02 | 0.56 ± 0.03 | 0.05 (-0.02, 0.12) | 0.068 |
| FMD, % | 21.0 ± 1.6 | 23.1 ± 3.2 | -1.92 (-9.11, 5.16) | 0.311 |

*Student t-test.

SBP, systolic blood pressure; DBP, diastolic blood pressure; BMI, body mass index; TC, total cholesterol; TG, triglycerides; VLDL, very low density lipoprotein, HDL, high density lipoprotein; LDL, low density lipoprotein; SHBG, steroid hormone binding globulin; ALT, alanine aminotransferase; AST, aspartate aminotransferase; GGT, gamma glutamyl transferase; TT, total testosterone; FT, free testosterone; ADMA asymmetric dimethyl arginine; CIMT, carotid intima media thickness; FMD, flow mediated vasodilation.
